# Supplementary material for: Plant Materials are Sustainable Substrates Supporting New Technologies of Plant-Only-Based Culture Media for in vitro Culturing of the Plant Microbiota
Source: PubMed Central journal article supplement (PMC5877342; doi:10.1264/jsme2.me17135), 2018-03-29
Supplement: 33_40_s1.pdf [file 33_40_s1.pdf]

**Table S1: The tested 16 rhizobacteria isolates**

| <b>Original Strain code no.</b> | <b>Abbreviation used in the study</b> | <b>Species</b>                  | <b>Family</b>             | <b>Source*</b> |
|---------------------------------|---------------------------------------|---------------------------------|---------------------------|----------------|
| Azt B4                          | A1                                    | <i>Azotobacter chroococcum</i>  | <i>Pseudomonadaceae</i>   | (2)            |
| B43                             | B1                                    | <i>Bacillus circulans</i>       | <i>Bacillaceae</i>        | (1)            |
| 3B                              | B2                                    | <i>Bacillus circulans</i>       | <i>Bacillaceae</i>        | (2)            |
| En 71/3                         | B3                                    | <i>Bacillus licheniformis</i>   | <i>Bacillaceae</i>        | (3)            |
| 21B                             | B4                                    | <i>Bacillus macerans</i>        | <i>Bacillaceae</i>        | (1)            |
| 1E                              | B5                                    | <i>Bacillus polymyxa</i>        | <i>Bacillaceae</i>        | (2)            |
| 30B                             | B6                                    | <i>Bacillus polymyxa</i>        | <i>Bacillaceae</i>        | (1)            |
| NA 20                           | B7                                    | <i>Bacillus subtilis</i>        | <i>Bacillaceae</i>        | (3)            |
| K4                              | E1                                    | <i>Enterobacter agglomerans</i> | <i>Enterobacteriaceae</i> | (2)            |
| K3                              | E2                                    | <i>Enterobacter agglomerans</i> | <i>Enterobacteriaceae</i> | (2)            |
| 31Sh                            | K1                                    | <i>Klebsiella</i> sp.           | <i>Enterobacteriaceae</i> | (1)            |
| En 5/1                          | P1                                    | <i>Pantoea</i> sp.              | <i>Enterobacteriaceae</i> | (3)            |
| Arbo 17                         | Ps1                                   | <i>Pseudomonas aeruginosa</i>   | <i>Pseudomonadaceae</i>   | (3)            |
| 34Sh                            | Ps2                                   | <i>Pseudomonas cepacia</i>      | <i>Pseudomonadaceae</i>   | (1)            |
| Arbo 4                          | Ps3                                   | <i>Pseudomonas fluorescens</i>  | <i>Pseudomonadaceae</i>   | (3)            |
| Pseu. B6                        | Ps4                                   | <i>Pseudomonas</i> sp.          | <i>Pseudomonadaceae</i>   | (2)            |

**\* For more information on the source of isolates and their characterization, please refer to the following references:**

1. Othman, A.A., W.M. Amer, M. Fayez, and N.A. Hegazi. 2004. Rhizosphere of Sinai desert plants is a potential repository for associative diazotrophs. *Microbiol. Res.* 159:285–293.
2. Othman, A.A., W.M. Amer, M. Fayez, M. Monib, and N.A. Hegazi. 2003. Biodiversity of diazotrophs associated to the plant cover of north Sinai deserts. *Arch. Agron. Soil Sci.* 49:683–705.
3. Youssef, H.H., M.A. Hamza, M. Fayez, *et al.* 2016. Plant-based culture media: Efficiently support culturing rhizobacteria and correctly mirror their *in-situ* diversity. *J. Adv. Res.* 7:305–316.

**Table S2: OTUs Richness (S'), Shannon-Wiener index (H'), and Dominance (D') of rhizobacterial populations associated to barley roots and CFUs harvested on various culture media based on DGGE analysis.**

| <b>Media</b>         | <b>Richness Taxa (S')</b> | <b>Shannon (H')</b> | <b>Dominance (D')</b> |
|----------------------|---------------------------|---------------------|-----------------------|
| <b>Barley root</b>   | 27                        | 3.296 ±0.159        | 0.037 ±0.011          |
| <b>Nutrient agar</b> | 22                        | 3.091 ±0.168        | 0.045 ±0.015          |
| <b>CCM</b>           | 18                        | 2.890 ±0.177        | 0.056 ±0.018          |
| <b>Soil extract</b>  | 17                        | 2.833 ±0.178        | 0.059 ±0.020          |
| <b>Grass powder</b>  | 28                        | 3.332 ±0.156        | 0.036 ±0.011          |
| <b>Clover powder</b> | 30                        | 3.401 ±0.153        | 0.033 ±0.010          |
| <b>Clover slurry</b> | 31                        | 3.434 ±0.156        | 0.032 ±0.010          |
| <b>Cactus powder</b> | 31                        | 3.434 ±0.153        | 0.032 ±0.010          |

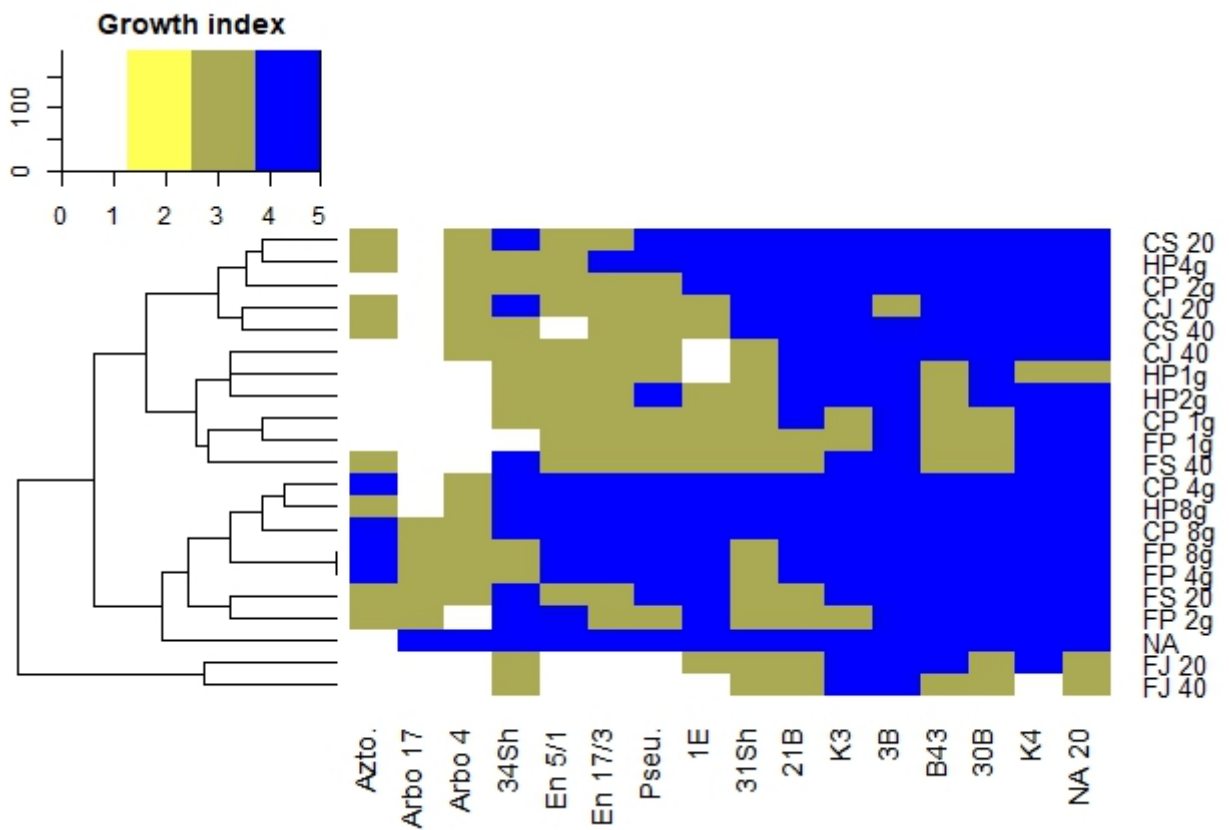

**Fig. S1:** Heatmap showing the growth indices [0, no growth; 1, scant (discontinued bacterial lawn, with scattered colonies); 2-3, good (continued bacterial lawn), and 4-5, very good (continued and very dense bacterial lawn)] of all tested isolates grown on 20 different formulations of plant-only culture media based on plant juices and slurries dilutions (1:20 or 1:40, v/v) as well as weights of dehydrated plant powders (1, 2, 4, or 8 g L<sup>-1</sup>).

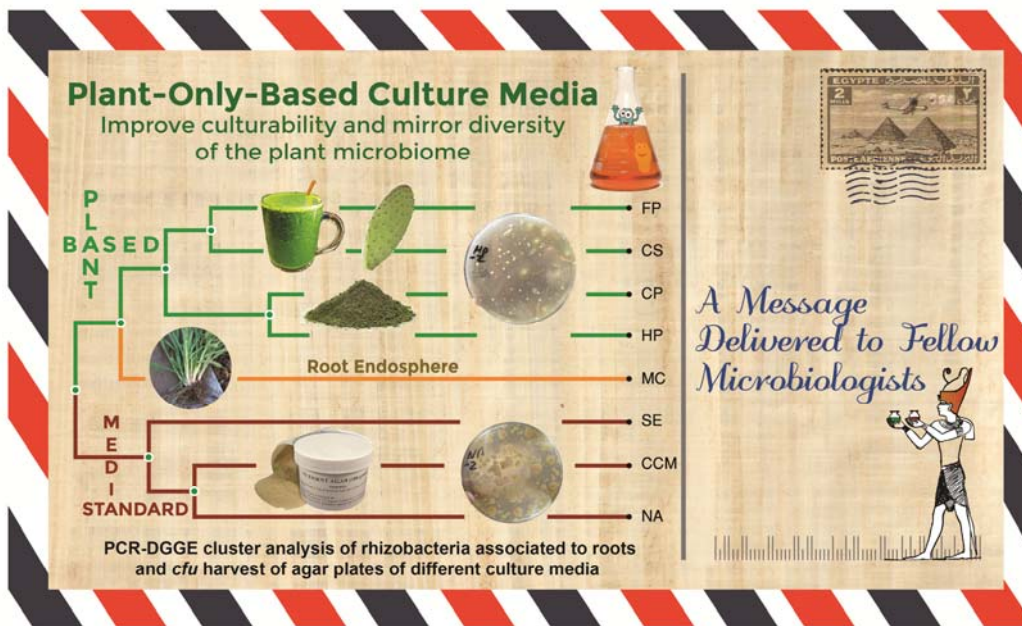

Fig. S2: Graphical abstract

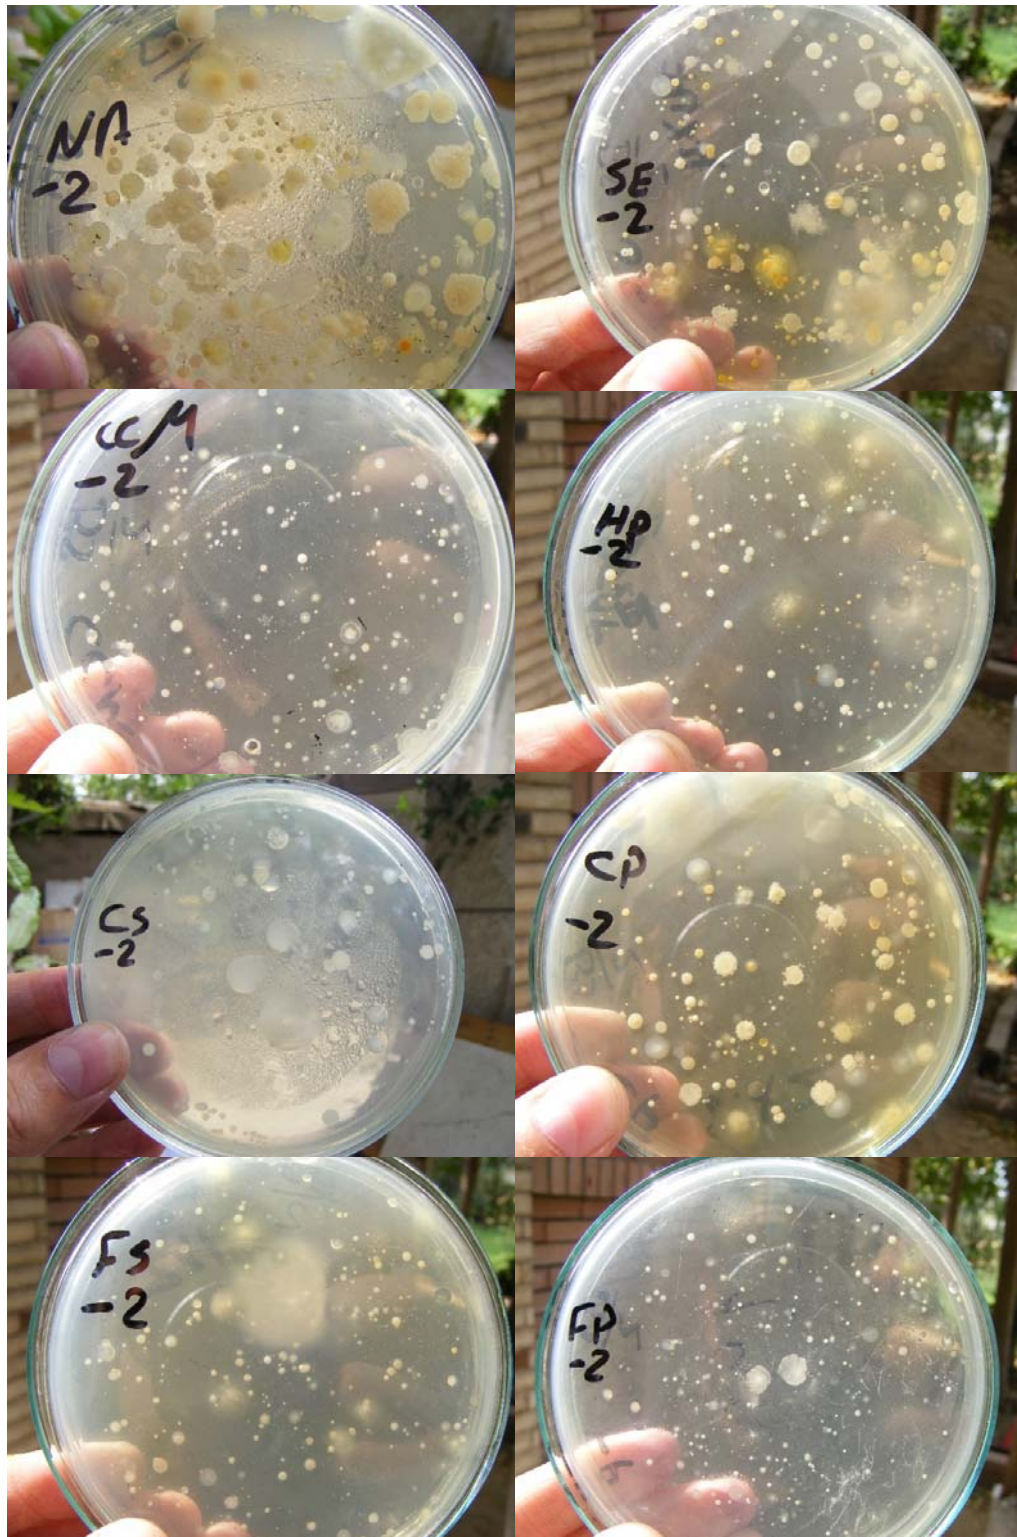

**Fig. S3:** CFU of endo-rhizobacteria as developed on the different tested culture media (comparing the same root dilution of  $10^{-2}$ ): **NA**, nutrient agar; **SE**, soil extract agar; **CCM**, N-deficient combined carbon sources medium; **HP**, turfgrass powder, **CS**, clover slurry; **CP**, clover powder; **FS**, cactus slurry; **FP**, cactus powder.
